# Supplementary material for: A honeycomb-like ZnO/SnO2 nanocomposite on nickel foam for high-performance asymmetric supercapacitors
Source: Royal Society of Chemistry journal article supplement (doi:10.1039/c9nj01270b), 2019-01-01
Supplement: c9nj01270b1.pdf [file c9nj01270b1.pdf]

## **Honeycomb-like ZnO/SnO<sub>2</sub> nanocomposite at nickel foam for high-performance asymmetric supercapacitors**

Awais Ali<sup>a</sup>, Muhammad Ammar<sup>a,c,\*</sup>, Zaid Yahya<sup>a</sup>, Muhammad Waqas<sup>b,c</sup>, Muhammad Ali Jamal<sup>a</sup>

Esmail Husein M Salhabi<sup>c,d</sup>

<sup>a</sup> Department of Chemical Engineering Technology, Government College University, Faisalabad 38000, Pakistan.

<sup>b</sup> Institute of Engineering Thermophysics, Chinese Academy of Sciences, Beijing 100190, China

<sup>c</sup> University of Chinese Academy of Sciences, Beijing, 100049, China.

<sup>d</sup> Institute of Process Engineering, Chinese Academy of Sciences, Beijing 100190, China.

\* Corresponding author: [mammar@gcuf.edu.pk](mailto:mammar@gcuf.edu.pk) (M. Ammar), Tel/Fax: +92419203027

### **Supplementary Information**

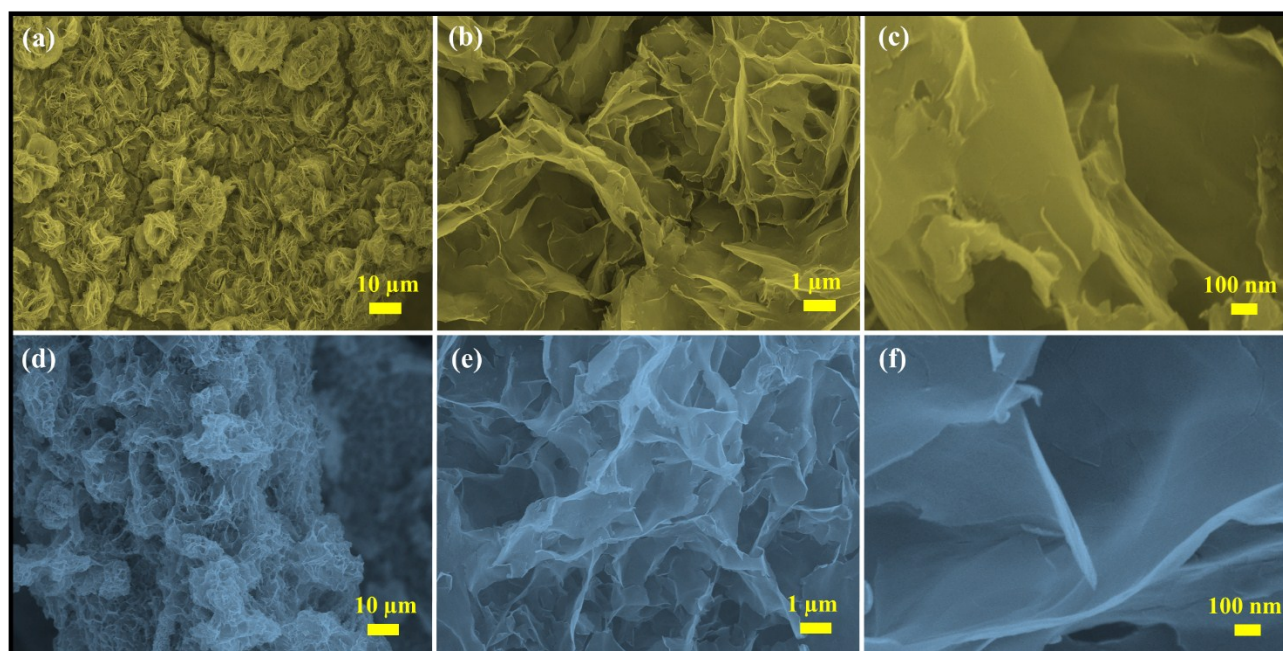

Fig. S1 SEM Images at different magnification: (a-c) ZnO (d-f) SnO<sub>2</sub>.

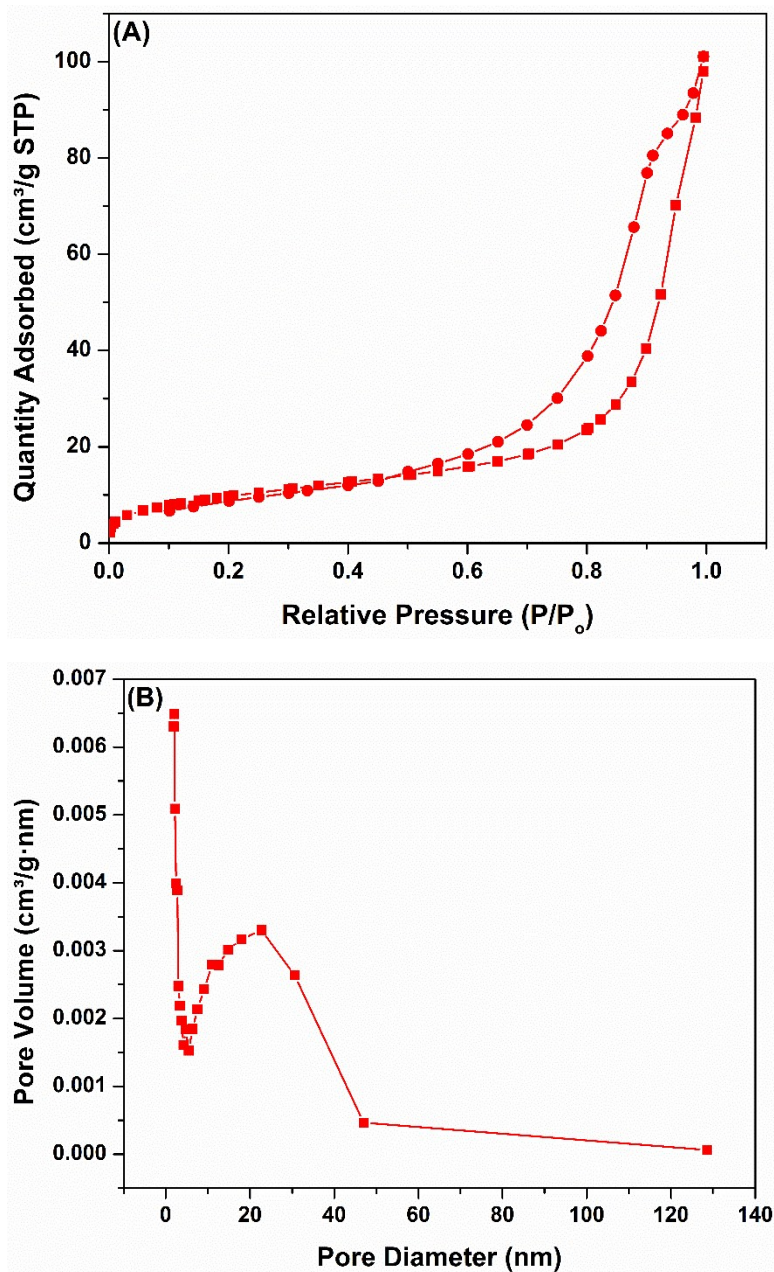

Fig. S2 N<sub>2</sub> adsorption-desorption isotherm of ZnO/SnO<sub>2</sub> nanocomposite (A), BJH pore size distribution of ZnO/SnO<sub>2</sub> nanocomposite (B).

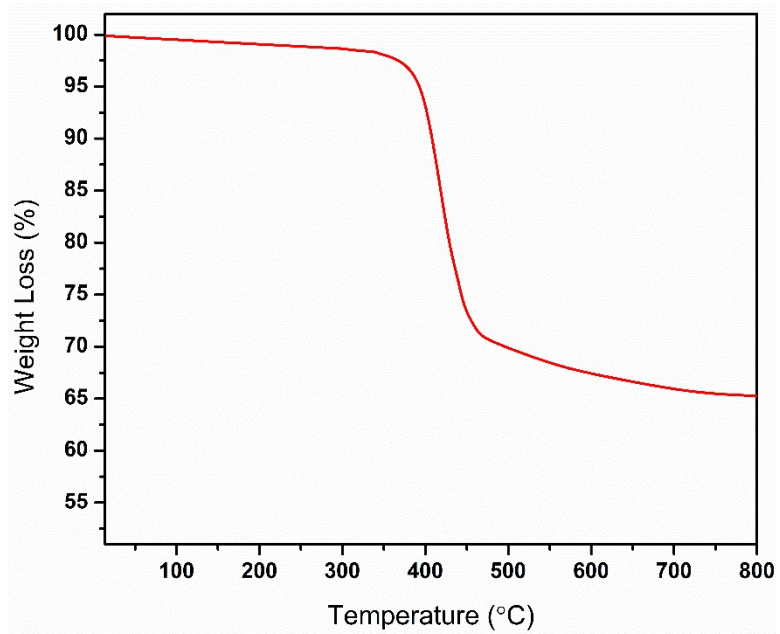

Fig. S3 TGA of ZnO/SnO<sub>2</sub> nanocomposite.

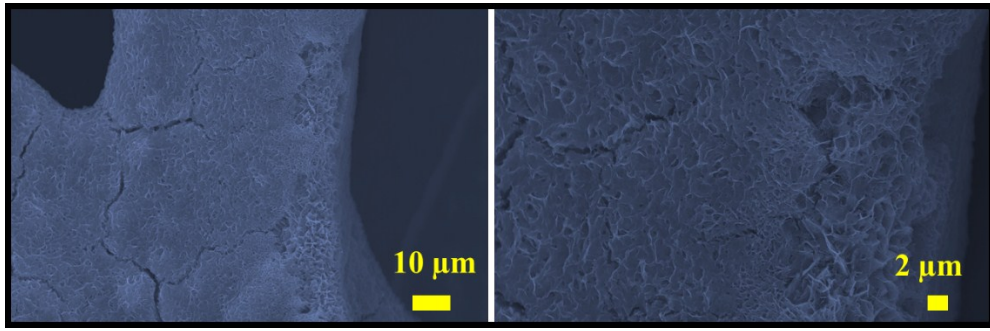

Fig. S4 SEM Images at different magnification after 7000 GCD.

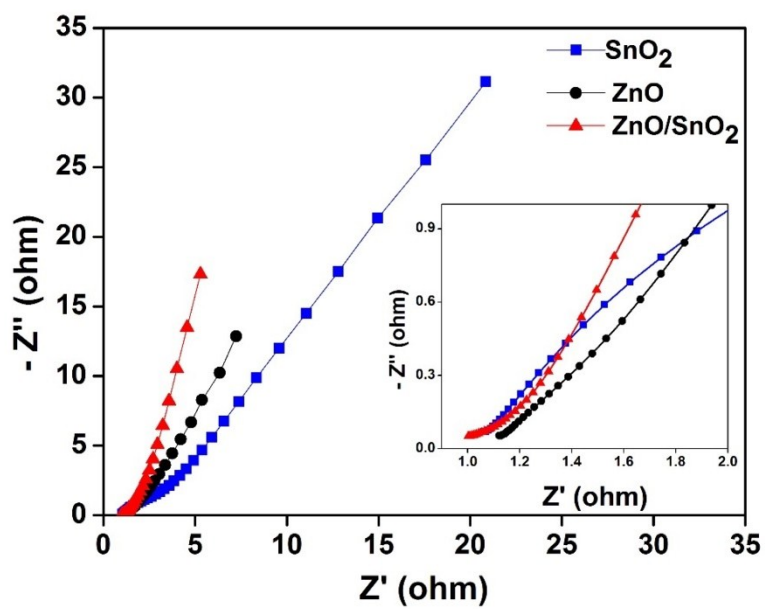

Fig. S5 Nyquist plot of ZnO, SnO<sub>2</sub> and ZnO/SnO<sub>2</sub> in 3M KOH.

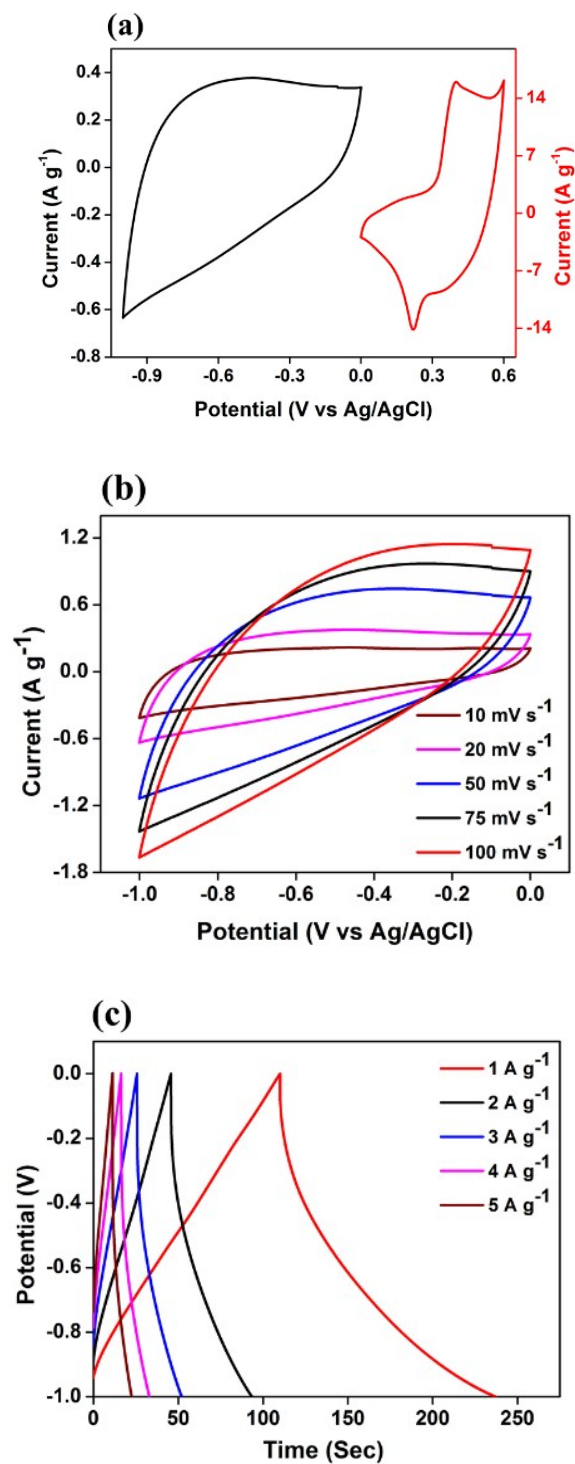

Fig. S6 Electrochemical performance of AC@NF in a 3M KOH electrolyte: (a) CV curves of ZNCO and AC@NF at 20  $\text{mV s}^{-1}$  (b) GCD of AC@NF at current density of 1 to 5  $\text{A g}^{-1}$  and (c) CV curves of AC@NF at different scan rate from 10 to 100  $\text{mV s}^{-1}$ .

**Table S1. Comparison of several Zinc and Tin oxide based electrode materials in the literature and this study.**

| Electrode                  | Electrolyte                          | Current density       | Scan rate<br>(mV s <sup>-1</sup> ) | Specific capacitance/<br>Capacity | Ref.      |
|----------------------------|--------------------------------------|-----------------------|------------------------------------|-----------------------------------|-----------|
| NiO/ZnO                    | 3 M KOH                              | 1 A g <sup>-1</sup>   |                                    | 976 F g <sup>-1</sup>             | 1         |
| ZnO/rGO                    | 1M Na <sub>2</sub> SO <sub>4</sub>   | -                     | 10                                 | 95 F g <sup>-1</sup>              | 2         |
| ZnO-MnO <sub>2</sub>       | 1M Na <sub>2</sub> SO <sub>4</sub>   | 0.5 A g <sup>-1</sup> | -                                  | 423 F g <sup>-1</sup>             | 3         |
| MnO <sub>2</sub> -ZnO      | 0.1M Na <sub>2</sub> SO <sub>4</sub> | -                     | 2                                  | 571 μF cm <sup>-2</sup>           | 4         |
| Core-shell ZnO-NiO         | 1 M KOH                              | 5 mA cm <sup>-2</sup> | -                                  | 4.1 F cm <sup>-2</sup>            | 5         |
| ZnO-NiO                    | 1 M KOH                              | 5 mA cm <sup>-2</sup> | -                                  | 0.5 F cm <sup>-2</sup>            | 5         |
| ZnO-NiO                    | 3 M KOH                              | -                     | 5.8                                | 649 F g <sup>-1</sup>             | 6         |
| Sn <sub>2</sub> O/G        | 6M KOH                               | -                     | 5                                  | 818.6 F g <sup>-1</sup>           | 7         |
| SnO <sub>2</sub> /SWCNT    | 1 M Na <sub>2</sub> SO <sub>4</sub>  |                       | 6                                  | 320                               | 8         |
| SnO <sub>2</sub> /Graphene | 1 M Na <sub>2</sub> SO <sub>4</sub>  |                       | 5                                  | 363.3                             | 9         |
| ZnO/SnO <sub>2</sub>       | 3 M KOH                              | 1                     | -                                  | 2,307 F g <sup>-1</sup>           | This work |



## References

1. D. Zhu and Y. Shao, *Int. J. Electrochem. Sc.*, 2018, **13**, 3601-3612.
2. I. Y. Bu and R. Huang, *Mater. Sci. Semicond. Process.*, 2015, **31**, 131-138.
3. M. Huang, F. Li, X. L. Zhao, D. Luo, X. Q. You, Y. X. Zhang and G. Li, *Electrochim. Acta*, 2015, **152**, 172-177.
4. X. Zhou and L. Ma, *Thin Solid Films*, 2015, **597**, 44-49.
5. C. Wei, H. Pang, C. Cheng, J. Zhao, P. Li and Y. Zhang, *CrystEngComm*, 2014, **16**, 4169-4175.
6. H. Pang, Y. Ma, G. Li, J. Chen, J. Zhang, H. Zheng and W. Du, *Dalton Trans.*, 2012, **41**, 13284-13291.
7. V. Velmurugan, U. Srinivasarao, R. Ramachandran, M. Saranya and A. N. Grace, *Mater. Res. Bull.*, 2016, **84**, 145-151.
8. S. Ren, Y. Yang, M. Xu, H. Cai, C. Hao and X. Wang, *Colloids Surf.* , 2014, **444**, 26-32.
9. H. Su, T. Wang, S. Zhang, J. Song, C. Mao, H. Niu, B. Jin, J. Wu and Y. Tian, *Solid State Sci.*, 2012, **14**, 677-681.
